# Supplementary material for: Vaginal microbiome variances in sample groups categorized by clinical criteria of bacterial vaginosis
Source: BMC Genomics. 2018 Dec 31;19(Suppl 10):876. doi: 10.1186/s12864-018-5284-7 (PMC6311936; doi:10.1186/s12864-018-5284-7)
Supplement: Supplementary file 9 — PICRUSt predictive functional profiling (KEGG databases at level 3) between the A–N– and A–N* groups (Table S3), the A–N– and A + N+ groups (Table S4), the A–N– and A + N* groups (Table S5), the A + N– and A + N* groups (Table S6), the A + N– and A + N+ (Table S7), the A + N* and A + N+ groups (Table S8). Table S9: 32 predictive functional categories which differed significantly between any two of the A − N−, A − N*, A + N−, A + N* and A + N+ groups (XLSX 43 kb) [file 12864_2018_5284_MOESM9_ESM.xlsx]

## Sheet: Table S3
Table S3. PICRUSt predictive functional profiling (KEGG databases at level 3) between the A-N- and A-N* groups
NO	Function	mean_A-N-	mean_A-N*	p-value	BONF
1	Germination	9.16473	11.4402	2.14754e-06	0.001
2	RIG.I.like.receptor.signaling.pathway	4.15298	7.61956	4.96222e-06	0.001
3	Phosphotransferase.system..PTS.	11.2147	13.5359	1.94776e-05	0.005
4	D.Arginine.and.D.ornithine.metabolism	5.44799	8.07873	3.40323e-05	0.009
5	Butirosin.and.neomycin.biosynthesis	12.5839	11.5226	3.96633e-05	0.011
6	Cyanoamino.acid.metabolism	14.3246	13.7987	4.97044e-05	0.014
7	Ion.channels	11.9369	10.5004	6.19909e-05	0.017
8	Bladder.cancer	5.12027	8.10739	7.12829e-05	0.02
9	Prion.diseases	11.0373	9.5924	7.69143e-05	0.021
10	Peroxisome	14.784	14.1926	9.50101e-05	0.026
11	Retinol.metabolism	12.6667	11.9114	0.000116802	0.032
12	Flavonoid.biosynthesis	10.9497	9.66494	0.00014301	0.04
13	Isoquinoline.alkaloid.biosynthesis	12.6536	12.1004	0.000174331	0.048
14	Renal.cell.carcinoma	11.1481	10.091	0.000174331	0.048
15	Influenza.A	3.56526	6.64473	0.000211369	0.059
16	Tyrosine.metabolism	15.2651	14.8985	0.000211691	0.059
17	Small.cell.lung.cancer	3.60128	6.64116	0.000245443	0.068
18	Colorectal.cancer	3.56526	6.63894	0.000246737	0.069
19	Toxoplasmosis	3.56526	6.63894	0.000246737	0.069
20	Viral.myocarditis	3.56526	6.63894	0.000246737	0.069
21	Sporulation	12.8656	14.1087	0.00025603	0.071
22	Ubiquitin.system	11.5028	10.4794	0.00025603	0.071
23	Apoptosis	3.86165	6.85795	0.00028573	0.079
24	Vibrio.cholerae.infection	3.42893	6.54709	0.000306156	0.085
25	Amyotrophic.lateral.sclerosis..ALS.	12.584	11.3247	0.000308532	0.086
26	Nucleotide.metabolism	9.29079	10.8478	0.000308532	0.086
27	p53.signaling.pathway	4.02952	7.0554	0.000330876	0.092
28	Pentose.and.glucuronate.interconversions	15.1708	14.8183	0.000528411	0.147
29	Base.excision.repair	15.3395	14.8716	0.000627987	0.175
30	Drug.metabolism...other.enzymes	14.4939	14.1012	0.000743885	0.207
31	Protein.processing.in.endoplasmic.reticulum	12.977	12.2077	0.000743885	0.207
32	Starch.and.sucrose.metabolism	15.8978	15.5079	0.000878478	0.244
33	Staphylococcus.aureus.infection	8.2519	10.1305	0.0009666	0.269
34	Folate.biosynthesis	15.4144	14.9779	0.00103421	0.288
35	General.function.prediction.only	18.3645	17.9949	0.00103421	0.288
36	Toluene.degradation	14.1284	13.587	0.00103421	0.288
37	Endocytosis	0.647327	3.27177	0.00109156	0.303
38	Fc.gamma.R.mediated.phagocytosis	0.647327	3.27177	0.00109156	0.303
39	GnRH.signaling.pathway	0.647327	3.27177	0.00109156	0.303
40	Adipocytokine.signaling.pathway	12.4819	12.0389	0.00110747	0.308
41	Bisphenol.degradation	12.0151	12.5487	0.00121401	0.337
42	Fatty.acid.biosynthesis	15.7188	15.3554	0.00121401	0.337
43	Novobiocin.biosynthesis	13.7166	13.3532	0.00121401	0.337
44	RNA.degradation	15.226	14.9346	0.00121401	0.337
45	DNA.repair.and.recombination.proteins	17.7596	17.4421	0.0014209	0.395
46	Isoflavonoid.biosynthesis	4.11381	6.68116	0.00153751	0.427
47	DNA.replication	15.6316	15.3134	0.00165844	0.461
48	DNA.replication.proteins	16.3716	16.0636	0.00165844	0.461
49	Galactose.metabolism	15.0829	14.6412	0.00165844	0.461
50	Histidine.metabolism	15.8421	15.5433	0.00165844	0.461
51	Homologous.recombination	16.0842	15.7539	0.00165844	0.461
52	Synthesis.and.degradation.of.ketone.bodies	13.8302	13.2768	0.00165844	0.461
53	Mismatch.repair	15.8255	15.5423	0.00193031	0.537
54	Bile.secretion	3.45753	6.18535	0.00199862	0.556
55	D.Glutamine.and.D.glutamate.metabolism	13.4985	13.1366	0.00224081	0.623
56	Ethylbenzene.degradation	12.924	12.6641	0.00224081	0.623
57	Translation.proteins	16.2265	15.9236	0.00224081	0.623
58	Flagellar.assembly	14.299	15.4642	0.00259435	0.721
59	Amino.acid.related.enzymes	16.8953	16.5841	0.00299609	0.833
60	Glycan.biosynthesis.and.metabolism	10.8964	12.1249	0.00299609	0.833
61	Lipid.biosynthesis.proteins	15.9677	15.6799	0.00299609	0.833
62	Valine..leucine.and.isoleucine.degradation	15.9651	15.6445	0.00299609	0.833
63	beta.Lactam.resistance	11.6199	10.6619	0.00299609	0.833
64	Basal.transcription.factors	4.22564	6.31278	0.00345128	0.959
65	Cysteine.and.methionine.metabolism	16.2444	15.9686	0.00345128	0.959
66	Parkinson.s.disease	9.43782	10.9611	0.00345128	0.959
67	Polyketide.sugar.unit.biosynthesis	13.8881	13.5703	0.00345128	0.959
68	Selenocompound.metabolism	14.9732	14.695	0.00345128	0.959
69	Streptomycin.biosynthesis	14.7243	14.3013	0.00345128	0.959
70	Tropane..piperidine.and.pyridine.alkaloid.biosynthesis	13.5305	13.2118	0.00345128	0.959
71	Lysine.degradation	15.0732	14.6635	0.00396595	1
72	Tryptophan.metabolism	15.391	15.0207	0.00396595	1
73	Glycerolipid.metabolism	14.5843	14.3378	0.00454637	1
74	Styrene.degradation	12.4034	12.0578	0.00454637	1
75	Various.types.of.N.glycan.biosynthesis	1.41239	3.15364	0.00465238	1
76	Cardiac.muscle.contraction	9.38535	10.7887	0.00509092	1
77	Arginine.and.proline.metabolism	16.7391	16.4278	0.00519956	1
78	Carotenoid.biosynthesis	12.2195	11.5688	0.00572989	1
79	Benzoate.degradation	14.9827	14.6046	0.00593278	1
80	Fatty.acid.metabolism	15.448	15.1009	0.00593278	1
81	Proximal.tubule.bicarbonate.reclamation	11.0807	10.2568	0.00593278	1
82	Translation.factors	15.2566	15.0163	0.00593278	1
83	Bacterial.invasion.of.epithelial.cells	4.80343	6.58218	0.00643545	1
84	Epithelial.cell.signaling.in.Helicobacter.pylori.infection	10.3449	11.4248	0.00675422	1
85	Pentose.phosphate.pathway	15.8985	15.595	0.00675422	1
86	Tetracycline.biosynthesis	13.9231	13.6353	0.00675422	1
87	Pathways.in.cancer	11.8571	11.5367	0.00767221	1
88	Penicillin.and.cephalosporin.biosynthesis	12.3678	11.897	0.00767221	1
89	Indole.alkaloid.biosynthesis	2.04769	4.2063	0.00772413	1
90	Others	16.3987	16.1731	0.00869611	1
91	Function.unknown	17.2133	16.9587	0.00983547	1
92	Lysine.biosynthesis	15.927	15.5586	0.00983547	1
93	Other.ion.coupled.transporters	16.6817	16.3467	0.00983547	1
94	Glycosphingolipid.biosynthesis...globo.series	11.806	11.0281	0.0107168	1
95	Peptidases	16.9686	16.7813	0.0111009	1
96	Pyrimidine.metabolism	16.9962	16.7441	0.0111009	1
97	Betalain.biosynthesis	2.16114	4.34512	0.0117387	1
98	Glycan.bindng.proteins	0	0.628456	0.0122673	1
99	Alanine..aspartate.and.glutamate.metabolism	16.2801	16.0478	0.0125031	1
100	Citrate.cycle..TCA.cycle.	16.241	15.9391	0.0125031	1
101	Energy.metabolism	16.049	15.8236	0.0125031	1
102	Nucleotide.excision.repair	14.7751	14.555	0.0125031	1
103	Phenylalanine.metabolism	14.6713	14.3673	0.0125031	1
104	Purine.metabolism	17.4322	17.1523	0.0125031	1
105	Sulfur.relay.system	14.9744	14.545	0.0125031	1
106	Glycine..serine.and.threonine.metabolism	16.2466	16.011	0.014054	1
107	Glyoxylate.and.dicarboxylate.metabolism	15.603	15.3893	0.014054	1
108	Oxidative.phosphorylation	16.9486	16.6586	0.014054	1
109	Ubiquinone.and.other.terpenoid.quinone.biosynthesis	14.761	14.5735	0.014054	1
110	alpha.Linolenic.acid.metabolism	11.185	11.0422	0.014054	1
111	Zeatin.biosynthesis	11.6072	11.3737	0.0157656	1
112	Carbon.fixation.in.photosynthetic.organisms	15.4373	15.2102	0.0176512	1
113	Sulfur.metabolism	14.7432	14.4977	0.0176512	1
114	Bacterial.motility.proteins	16.0135	16.7055	0.0197239	1
115	Cell.cycle...Caulobacter	15.2602	15.0504	0.0197239	1
116	Cellular.antigens	12.745	12.4463	0.0197239	1
117	Insulin.signaling.pathway	12.0873	11.7536	0.0197239	1
118	Lipoic.acid.metabolism	12.569	12.267	0.0197239	1
119	Nicotinate.and.nicotinamide.metabolism	15.0356	14.7989	0.0197239	1
120	Ribosome	17.3328	17.1068	0.0197239	1
121	beta.Alanine.metabolism	14.8172	14.5691	0.0197239	1
122	Vasopressin.regulated.water.reabsorption	1.01796	2.46288	0.0209939	1
123	Bacterial.chemotaxis	14.7068	15.3281	0.0219983	1
124	Glycolysis...Gluconeogenesis	16.5871	16.3008	0.0219983	1
125	PPAR.signaling.pathway	13.2929	12.901	0.0219983	1
126	Renin.angiotensin.system	3.80186	5.83053	0.0234464	1
127	Flavone.and.flavonol.biosynthesis	1.04963	2.60832	0.024383	1
128	Glycosphingolipid.biosynthesis...lacto.and.neolacto.series	0.901677	2.21605	0.0244851	1
129	Chromosome	16.8405	16.577	0.0244889	1
130	Prenyltransferases	14.7453	14.5271	0.0244889	1
131	Limonene.and.pinene.degradation	14.3635	14.2997	0.0272114	1
132	One.carbon.pool.by.folate	15.3982	15.1896	0.0272114	1
133	Vitamin.B6.metabolism	13.8904	13.6993	0.0272114	1
134	Hypertrophic.cardiomyopathy..HCM.	3.74336	5.66937	0.028636	1
135	Huntington.s.disease	13.0856	12.7606	0.0287238	1
136	Transcription.machinery	15.9019	15.7219	0.0301815	1
137	Carbohydrate.metabolism	13.2681	12.6796	0.033416	1
138	Photosynthesis...antenna.proteins	0	0.53583	0.0334228	1
139	Cell.cycle	0	0.320763	0.0336134	1
140	Hepatitis.C	0	0.320763	0.0336134	1
141	Measles	0	0.320763	0.0336134	1
142	Phagosome	0	0.320763	0.0336134	1
143	mTOR.signaling.pathway	0	0.320763	0.0336134	1
144	Naphthalene.degradation	14.0347	13.8905	0.0369319	1
145	Pantothenate.and.CoA.biosynthesis	15.5642	15.3538	0.0369319	1
146	Systemic.lupus.erythematosus	1.63403	2.79755	0.0379561	1
147	Cytochrome.P450	0.105263	1.06801	0.0385463	1
148	Ascorbate.and.aldarate.metabolism	13.6119	13.35	0.0407468	1
149	Carbon.fixation.pathways.in.prokaryotes	16.679	16.4144	0.0407468	1
150	Phenylalanine..tyrosine.and.tryptophan.biosynthesis	16.021	15.7626	0.0448786	1
151	Pyruvate.metabolism	16.6175	16.3767	0.0448786	1
152	Signal.transduction.mechanisms	14.6812	14.9285	0.0448786	1
* The p-values are calculated by the Wilcoxon rank-sum test
* BONF: The ajusted p-values using Bonferroni correction
* mean: average sum of 2-based logtransform of predicvtive functional reads

## Sheet: Table S4
Table S4. PICRUSt predictive functional profiling (KEGG databases at level 3) between the A-N- and A+N+ groups
NO	KEGG (Level 3)	mean_A-N-	mean_A+N+	p-value	BONF
1	D.Arginine.and.D.ornithine.metabolism	5.44799	8.50959	1.46447e-07	0
2	Sporulation	12.8656	14.8876	1.46447e-07	0
3	Germination	9.16473	12.1852	4.39341e-07	0
4	Phosphotransferase.system..PTS.	11.2147	13.9738	2.45299e-06	0.001
5	Nucleotide.metabolism	9.29079	11.6	3.55134e-06	0.001
6	Bacterial.chemotaxis	14.7068	16.1104	7.13929e-06	0.002
7	Protein.kinases	14.3911	15.2851	9.92178e-06	0.003
8	Bacterial.motility.proteins	16.0135	17.5809	1.83425e-05	0.005
9	Flagellar.assembly	14.299	16.3696	1.83425e-05	0.005
10	Signal.transduction.mechanisms	14.6812	15.2983	2.45299e-05	0.007
11	Staphylococcus.aureus.infection	8.2519	11.6867	2.46432e-05	0.007
12	Meiosis...yeast	9.97192	11.9997	5.57231e-05	0.015
13	Parkinson.s.disease	9.43782	11.5853	7.20153e-05	0.019
14	Two.component.system	16.8617	17.7151	7.20153e-05	0.019
15	Cyanoamino.acid.metabolism	14.3246	13.6608	9.24812e-05	0.025
16	Glycan.biosynthesis.and.metabolism	10.8964	12.9073	9.24812e-05	0.025
17	Flavonoid.biosynthesis	10.9497	8.94081	0.000117853	0.032
18	Prion.diseases	11.0373	9.67759	0.000117853	0.032
19	Proximal.tubule.bicarbonate.reclamation	11.0807	10.0283	0.000117853	0.032
20	Styrene.degradation	12.4034	11.4305	0.000117853	0.032
21	Ion.channels	11.9369	10.5599	0.000187855	0.051
22	Peroxisome	14.784	14.1139	0.000187855	0.051
23	Vibrio.cholerae.pathogenic.cycle	12.7043	14.0361	0.000187855	0.051
24	Cardiac.muscle.contraction	9.38535	11.5649	0.000214288	0.058
25	Benzoate.degradation	14.9827	14.2601	0.000235121	0.063
26	Limonene.and.pinene.degradation	14.3635	13.8818	0.000235121	0.063
27	Lysine.degradation	15.0732	14.4676	0.000235121	0.063
28	Nitrotoluene.degradation	12.8703	14.5755	0.000235121	0.063
29	Tryptophan.metabolism	15.391	14.7914	0.000235121	0.063
30	Phosphonate.and.phosphinate.metabolism	12.2264	11.525	0.000362053	0.097
31	Renal.cell.carcinoma	11.1481	10.3298	0.000362053	0.097
32	Bacterial.invasion.of.epithelial.cells	4.80343	7.67695	0.000383335	0.103
33	Carotenoid.biosynthesis	12.2195	10.4836	0.00041653	0.112
34	Amyotrophic.lateral.sclerosis..ALS.	12.584	11.46	0.000445748	0.12
35	Cellular.antigens	12.745	11.9257	0.000445748	0.12
36	Ethylbenzene.degradation	12.924	12.0345	0.000445748	0.12
37	Pentose.and.glucuronate.interconversions	15.1708	14.8258	0.000445748	0.12
38	Glycosphingolipid.biosynthesis...globo.series	11.806	10.7867	0.000546247	0.147
39	Pathways.in.cancer	11.8571	11.4174	0.000666077	0.179
40	Secretion.system	16.5533	17.3812	0.000666077	0.179
41	Synthesis.and.degradation.of.ketone.bodies	13.8302	13.2193	0.000666077	0.179
42	Valine..leucine.and.isoleucine.degradation	15.9651	15.5105	0.000666077	0.179
43	Hypertrophic.cardiomyopathy..HCM.	3.74336	7.04275	0.000726202	0.195
44	Renin.angiotensin.system	3.80186	7.04625	0.000782004	0.21
45	Various.types.of.N.glycan.biosynthesis	1.41239	5.00495	0.000905478	0.244
46	Isoflavonoid.biosynthesis	4.11381	7.07879	0.000987295	0.266
47	Penicillin.and.cephalosporin.biosynthesis	12.3678	11.6982	0.00200317	0.539
48	Dioxin.degradation	10.0903	11.4328	0.0020878	0.562
49	Proteasome	11.5908	12.7924	0.0023742	0.639
50	Butirosin.and.neomycin.biosynthesis	12.5839	11.9738	0.00280362	0.754
51	Plant.pathogen.interaction	13.2685	13.684	0.00329949	0.888
52	Bile.secretion	3.45753	5.71759	0.00341031	0.917
53	Other.glycan.degradation	12.6561	11.7537	0.00386971	1
54	Vibrio.cholerae.infection	3.42893	5.87338	0.0047674	1
55	Bladder.cancer	5.12027	7.08683	0.00514212	1
56	Cell.motility.and.secretion	14.0158	14.5694	0.00527147	1
57	Fatty.acid.metabolism	15.448	15.1552	0.00527147	1
58	Tyrosine.metabolism	15.2651	14.888	0.00527147	1
59	mRNA.surveillance.pathway	8.38195	10.2957	0.00527147	1
60	Bisphenol.degradation	12.0151	12.6373	0.00612382	1
61	beta.Alanine.metabolism	14.8172	14.5326	0.00709209	1
62	Basal.transcription.factors	4.22564	6.34419	0.00761776	1
63	Drug.metabolism...other.enzymes	14.4939	14.1776	0.00942906	1
64	Glycosyltransferases	14.7229	15.4318	0.00942906	1
65	Biosynthesis.of.unsaturated.fatty.acids	13.9539	14.4049	0.0108259	1
66	Naphthalene.degradation	14.0347	13.7514	0.0108259	1
67	Adipocytokine.signaling.pathway	12.4819	12.0339	0.0141538	1
68	beta.Lactam.resistance	11.6199	11.1422	0.0141538	1
69	Isoquinoline.alkaloid.biosynthesis	12.6536	12.3092	0.0161189	1
70	Thiamine.metabolism	14.7269	15.1417	0.0161189	1
71	Ascorbate.and.aldarate.metabolism	13.6119	13.2695	0.0207452	1
72	Bacterial.toxins	12.6933	13.0377	0.0207452	1
73	Electron.transfer.carriers	11.5373	12.7384	0.0207452	1
74	Retinol.metabolism	12.6667	12.3585	0.0207452	1
75	Carbohydrate.metabolism	13.2681	12.9493	0.0234467	1
76	Photosynthesis.proteins	13.9993	14.8387	0.0234467	1
77	Ribosome.Biogenesis	16.3902	16.6871	0.0234467	1
78	Metabolism.of.cofactors.and.vitamins	13.5042	13.8435	0.026435	1
79	Aminobenzoate.degradation	14.4346	14.1282	0.0297334	1
80	Bacterial.secretion.system	15.5468	15.9284	0.0297334	1
81	Others	16.3987	16.2282	0.0297334	1
82	Photosynthesis	13.9818	14.8025	0.0297334	1
83	Glycerolipid.metabolism	14.5843	14.4723	0.0333644	1
84	Metabolism.of.xenobiotics.by.cytochrome.P450	12.6078	12.925	0.0333644	1
85	Base.excision.repair	15.3395	15.0648	0.037353	1
86	Lipid.metabolism	13.0467	13.3754	0.037353	1
87	PPAR.signaling.pathway	13.2929	13.0206	0.037353	1
88	RNA.transport	12.7234	13.5732	0.037353	1
89	alpha.Linolenic.acid.metabolism	11.185	10.8374	0.037353	1
90	D.Alanine.metabolism	12.667	13.0179	0.0417234	1
* The p-values are calculated by the Wilcoxon rank-sum test
* BONF: The ajusted p-values using Bonferroni correction
* mean: average sum of 2-based logtransform of predicvtive functional reads

## Sheet: Table S5
Table S5. PICRUSt predictive functional profiling (KEGG databases at level 3) between the A-N- and A+N* groups
NO	KEGG (Level 3)	mean_A-N-	mean_A+N*	p-value	BONF
1	Restriction.enzyme	13.2575	14.0598	0.0119518	1
2	D.Arginine.and.D.ornithine.metabolism	5.44799	7.19232	0.0152456	1
3	RNA.transport	12.7234	13.8752	0.0239507	1
4	Styrene.degradation	12.4034	11.593	0.0239507	1
5	Germination	9.16473	10.833	0.0295502	1
6	Ion.channels	11.9369	10.6784	0.0295502	1
7	Lipopolysaccharide.biosynthesis	14.5426	15.6964	0.0295502	1
8	Lipopolysaccharide.biosynthesis.proteins	15.0183	16.1079	0.0295502	1
9	N.Glycan.biosynthesis	11.7643	12.9709	0.0301231	1
10	Flavonoid.biosynthesis	10.9497	9.61864	0.0361848	1
11	Linoleic.acid.metabolism	11.7061	12.734	0.0361848	1
12	Pertussis	11.4487	12.3122	0.0361848	1
13	Photosynthesis	13.9818	15.0373	0.0361848	1
14	Photosynthesis.proteins	13.9993	15.0569	0.0361848	1
15	Prion.diseases	11.0373	10.0352	0.0361848	1
* The p-values are calculated by the Wilcoxon rank-sum test
* BONF: The ajusted p-values using Bonferroni correction
* mean: average sum of 2-based logtransform of predicvtive functional reads

## Sheet: Table S6
Table S6. PICRUSt predictive functional profiling (KEGG databases at level 3) between the A+N- and A+N* groups
NO	KEGG (Level 3)	mean_A+N-	mean_A+N*	p-value	BONF
1	Aldosterone.regulated.sodium.reabsorption	0	0.2	0.0224943	1
2	Bacterial.invasion.of.epithelial.cells	4.18653	6.90944	0.0307931	1
* The p-values are calculated by the Wilcoxon rank-sum test
* BONF: The ajusted p-values using Bonferroni correction
* mean: average sum of 2-based logtransform of predicvtive functional reads

## Sheet: Table S7
Table S7. PICRUSt predictional functional profiling (KEGG databases at level 3) between the A+N- and A+N+ groups
NO	KEGG (Level 3)	mean_A+N-	mean_A+N+	p-value	BONF
1	Staphylococcus.aureus.infection	8.63605	11.6867	9.58679e-06	0.003
2	Hypertrophic.cardiomyopathy..HCM.	2.71382	7.04275	9.78138e-06	0.003
3	Renin.angiotensin.system	2.76822	7.04625	9.78138e-06	0.003
4	Isoflavonoid.biosynthesis	3.05224	7.07879	9.93474e-06	0.003
5	Phosphotransferase.system..PTS.	11.7704	13.9738	1.80268e-05	0.005
6	Bacterial.invasion.of.epithelial.cells	4.18653	7.67695	4.32756e-05	0.012
7	Germination	9.51089	12.1852	0.000158903	0.043
8	D.Arginine.and.D.ornithine.metabolism	5.8117	8.50959	0.000216718	0.059
9	Peroxisome	14.7307	14.1139	0.000218608	0.059
10	Sporulation	13.192	14.8876	0.000297612	0.081
11	Flavonoid.biosynthesis	10.4863	8.94081	0.000345943	0.094
12	Cyanoamino.acid.metabolism	14.2297	13.6608	0.000464106	0.126
13	Pentose.and.glucuronate.interconversions	15.1286	14.8258	0.000535706	0.146
14	Tryptophan.metabolism	15.3169	14.7914	0.000535706	0.146
15	Basal.transcription.factors	3.46413	6.34419	0.000625754	0.17
16	Drug.metabolism...other.enzymes	14.525	14.1776	0.000813006	0.221
17	Valine..leucine.and.isoleucine.degradation	15.9363	15.5105	0.000813006	0.221
18	Dioxin.degradation	10.3173	11.4328	0.00137846	0.375
19	Proximal.tubule.bicarbonate.reclamation	10.8575	10.0283	0.00177233	0.482
20	Various.types.of.N.glycan.biosynthesis	2.05863	5.00495	0.00187934	0.511
21	Butirosin.and.neomycin.biosynthesis	12.5111	11.9738	0.00200481	0.545
22	Limonene.and.pinene.degradation	14.2979	13.8818	0.00255153	0.694
23	Synthesis.and.degradation.of.ketone.bodies	13.7081	13.2193	0.00287097	0.781
24	Carotenoid.biosynthesis	11.6952	10.4836	0.00322496	0.877
25	Ion.channels	11.627	10.5599	0.00361654	0.984
26	Lysine.degradation	14.9933	14.4676	0.00361654	0.984
27	Prion.diseases	10.5449	9.67759	0.00404907	1
28	Glycosphingolipid.biosynthesis...globo.series	11.5698	10.7867	0.00473408	1
29	Retinol.metabolism	12.6948	12.3585	0.00562843	1
30	Tyrosine.metabolism	15.2677	14.888	0.00562843	1
31	DDT.degradation	4.14282	6.21518	0.00570993	1
32	Isoquinoline.alkaloid.biosynthesis	12.6642	12.3092	0.00626215	1
33	Naphthalene.degradation	14.0093	13.7514	0.00626215	1
34	Others	16.4599	16.2282	0.00626215	1
35	Fatty.acid.metabolism	15.4813	15.1552	0.00854759	1
36	Bladder.cancer	5.18643	7.08683	0.00872487	1
37	Carbohydrate.metabolism	13.2473	12.9493	0.0094542	1
38	Renal.cell.carcinoma	10.6828	10.3298	0.0094542	1
39	beta.Alanine.metabolism	14.8718	14.5326	0.0104421	1
40	Vibrio.cholerae.infection	3.57291	5.87338	0.0112605	1
41	Amyotrophic.lateral.sclerosis..ALS.	12.1881	11.46	0.0115173	1
42	Ascorbate.and.aldarate.metabolism	13.6407	13.2695	0.0115173	1
43	Glycerolipid.metabolism	14.6188	14.4723	0.0115173	1
44	Phenylpropanoid.biosynthesis	13.1723	12.4417	0.0115173	1
45	Bile.secretion	3.72631	5.71759	0.0135617	1
46	Adipocytokine.signaling.pathway	12.4724	12.0339	0.0153277	1
47	Base.excision.repair	15.3715	15.0648	0.0168151	1
48	Cardiac.muscle.contraction	9.93792	11.5649	0.0168151	1
49	Nucleotide.metabolism	10.0088	11.6	0.0168151	1
50	Parkinson.s.disease	9.99111	11.5853	0.0168151	1
51	RIG.I.like.receptor.signaling.pathway	3.75072	5.81925	0.017633	1
52	Aminobenzoate.degradation	14.4187	14.1282	0.0184228	1
53	Bacterial.chemotaxis	15.2183	16.1104	0.0184228	1
54	Ethylbenzene.degradation	12.595	12.0345	0.0184228	1
55	Benzoate.degradation	14.7765	14.2601	0.0201584	1
56	Xylene.degradation	9.49297	10.7805	0.0201584	1
57	Signal.transduction.mechanisms	14.9348	15.2983	0.0220296	1
58	Ribosome.biogenesis.in.eukaryotes	10.1989	11.1101	0.026211	1
59	Bacterial.motility.proteins	16.5447	17.5809	0.0285382	1
60	Flagellar.assembly	15.0237	16.3696	0.0285382	1
61	Glycan.biosynthesis.and.metabolism	11.5436	12.9073	0.0285382	1
62	Betalain.biosynthesis	1.8039	3.47718	0.0326606	1
63	Styrene.degradation	11.9196	11.4305	0.0337091	1
64	MAPK.signaling.pathway...yeast	10.1966	11.1504	0.036516	1
65	Metabolism.of.xenobiotics.by.cytochrome.P450	12.6204	12.925	0.0365712	1
66	Two.component.system	17.2568	17.7151	0.0365712	1
67	Cellular.antigens	12.3415	11.9257	0.0396304	1
68	Indole.alkaloid.biosynthesis	1.71525	3.36236	0.0409973	1
69	Epithelial.cell.signaling.in.Helicobacter.pylori.infection	10.4616	11.2232	0.0463784	1
70	Starch.and.sucrose.metabolism	16.0008	15.6922	0.0463784	1
* The p-values are calculated by the Wilcoxon rank-sum test
* BONF: The ajusted p-values using Bonferroni correction
* mean: average sum of 2-based logtransform of predicvtive functional reads

## Sheet: Table S8
Table S8. PICRUSt predictional functional profiling (KEGG databases at level 3) between the A+N* and A+N+ groups
NO	KEGG (Level 3)	mean_A+N*	mean_A+N+	p-value	BONF
1	Xylene.degradation	8.95739	10.7805	0.0132784	1
2	Staphylococcus.aureus.infection	9.85916	11.6867	0.0192308	1
3	Amoebiasis	7.77384	9.8315	0.0274725	1
4	D.Arginine.and.D.ornithine.metabolism	7.19232	8.50959	0.0274725	1
5	Various.types.of.N.glycan.biosynthesis	1.43399	5.00495	0.0307391	1
6	Phenylpropanoid.biosynthesis	13.2878	12.4417	0.0380037	1
7	Basal.transcription.factors	4.07551	6.34419	0.0466049	1
* The p-values are calculated by the Wilcoxon rank-sum test
* BONF: The ajusted p-values using Bonferroni correction
* mean: average sum of 2-based logtransform of predicvtive functional reads

## Sheet: Table S9
Table S9. 32 predictive functional categories which differed significantly between any two of the A−N−, A−N*, A+N−, A+N* and A+N+ groups
NO	Function
1	Bacterial chemotaxis
2	Bacterial invasion of epithelial cells
3	Bacterial motility proteins
4	Basal transcription factors
5	Butirosin and neomycin biosynthesis
6	Cyanoamino acid metabolism
7	D Arginine and D ornithine metabolism
8	Flagellar assembly
9	Flavonoid biosynthesis
10	Germination
11	Glycan biosynthesis and metabolism
12	Hypertrophic cardiomyopathy HCM
13	Ion channels
14	Isoflavonoid biosynthesis
15	Isoquinoline alkaloid biosynthesis
16	Meiosis yeast
17	Nucleotide metabolism
18	Peroxisome
19	Phenylpropanoid biosynthesis
20	Phosphotransferase system PTS
21	Protein kinases
22	Proximal tubule bicarbonate reclamation
23	Renin angiotensin system
24	Retinol metabolism
25	RIG I like receptor signaling pathway
26	Signal transduction mechanisms
27	Sporulation
28	Staphylococcus aureus infection
29	Styrene degradation
30	Two component system
31	Various types of N glycan biosynthesis
32	Xylene degradation
